# Supplementary material for: Relationship of 5-HTTLPR Polymorphism with Various Factors of Pain Processing: Subjective Experience, Motor Responsiveness and Catastrophizing
Source: PubMed Central journal article supplement (PMC4820275; doi:10.1371/journal.pone.0153089), 2016-04-04
Supplement: pone.0153089.s001.pdf [file pone.0153089.s001.pdf]

# 1. Pain Thresholds and 5HTTLPR

The tables below list pain threshold estimates that we assessed (N=sample size, Min=minimum, Max=maximum, mean, SD=standard deviation and variance).

**Table 1** lists the values for the S-allele carriers. **Table 2** lists the values for the non S-allele carriers.

**Table 1:**

|                | N  | Min   | Max   | Mean    | SD      | Variance |
|----------------|----|-------|-------|---------|---------|----------|
| Pain Threshold | 79 | 43.00 | 48.20 | 45.7314 | 1.17553 | 1.382    |

**Table 2:**

|                | N  | Min   | Max   | Mean    | SD      | Variance |
|----------------|----|-------|-------|---------|---------|----------|
| Pain Threshold | 48 | 42.40 | 48.70 | 46.2063 | 1.43374 | 2.056    |

## 2. Pain Catastrophizing and 5HTTLPR

The tables below list pain catastrophizing scores (PCS) that we assessed (N=sample size, Min=minimum, Max=maximum, mean, SD=standard deviation and variance).

**Table 3** lists the values for the S-allele carriers. **Table 4** lists the values for the non S-allele carriers.

**Table 3**

|                   | N  | Min  | Max   | Mean    | SD      | Variance |
|-------------------|----|------|-------|---------|---------|----------|
| PCS_rumination    | 79 | 0    | 15    | 6.84    | 3.044   | 9.267    |
| PCS_magnification | 79 | 0    | 9     | 3.33    | 2.055   | 4.224    |
| PCS_helplessness  | 79 | 0    | 15    | 6.41    | 3.716   | 13.808   |
| PCS_SUM score     | 79 | 3.00 | 35.00 | 16.5696 | 7.34268 | 53.915   |

**Table 4**

|                   | N  | Min | Max   | Mean    | SD      | Variance |
|-------------------|----|-----|-------|---------|---------|----------|
| PCS_rumination    | 48 | 0   | 14    | 5.60    | 3.413   | 11.648   |
| PCS_magnification | 48 | 0   | 7     | 2.85    | 2.042   | 4.170    |
| PCS_helplessness  | 48 | 0   | 11    | 5.19    | 2.937   | 8.624    |
| PCS_SUM score     | 48 | .00 | 30.00 | 13.6458 | 7.01818 | 49.255   |

### 3. Pain Ratings and 5HTTLPR

The tables below list pain ratings (Visual Analog Scale (VAS)) that we assessed (N=sample size, Min=minimum, Max=maximum, mean, SD=standard deviation and variance).

**Table 5** lists the values for the S-allele carriers. **Table 6** lists the values for the non S-allele carriers.

**Table 5**

|                             | N  | Min   | Max    | Mean    | SD       | Variance |
|-----------------------------|----|-------|--------|---------|----------|----------|
| VAS Rating non-painful heat | 79 | .00   | 54.70  | 18.3665 | 14.01085 | 196.304  |
| VAS Rating painful heat     | 79 | 36.40 | 100.00 | 80.3921 | 12.94186 | 167.492  |

**Table 6**

|                             | N  | Minimum | Maximum | Mean    | SD       | Variance |
|-----------------------------|----|---------|---------|---------|----------|----------|
| VAS Rating non-painful heat | 48 | ,00     | 56,70   | 16,5083 | 13,65739 | 186,524  |
| VAS Rating painful heat     | 48 | 48,00   | 100,00  | 83,6583 | 10,66639 | 113,772  |

## 4. Facial expression and 5HTTLPR

The tables below list facial expressions (coded using the Facial Action Coding System) that we assessed (N=sample size, Min=minimum, Max=maximum, mean, SD=standard deviation and variance).

**Table 7** lists the values for the S-allele carriers. **Table 8** lists the values for the non S-allele carriers.

**Table 7**

|                                    | N  | Min | Max  | Mean   | SD      | Variance |
|------------------------------------|----|-----|------|--------|---------|----------|
| facial expression non-painful heat | 78 | .00 | 2.36 | .2730  | .52728  | .278     |
| facial expression painful heat     | 78 | .00 | 6.38 | 1.6458 | 1.65993 | 2.755    |

**Table 8**

|                                    | N  | Min | Max  | Mean   | SD      | Variance |
|------------------------------------|----|-----|------|--------|---------|----------|
| facial expression non-painful heat | 48 | .00 | 2.00 | .4274  | .63284  | .400     |
| facial expression painful heat     | 48 | .00 | 6.71 | 1.9613 | 1.72164 | 2.964    |
